# Supplementary material
Source: publisher site journal article supplement (https://www.dovepress.com/article/477526)
Supplement: Supplementary file 1 [file get_supplementary_file.php]

**Table S****1 Characteristics of 206 participators**

| Characteristics | Data |
| --- | --- |
| Gender (male/female) | 66/140 |
| Age [median (IQR), years] | 31.00 (26.75, 36.00) |
| Height [median (IQR), m] | 1.62 (1.58, 1.68) |
| Weight [median (IQR), kg] | 57.00 (50.00, 65.25) |
| BMI (mean ± SD, kg/m2) | 21.90 ± 2.87 |
| Daily outdoor time [median (IQR), hour] | 2.00 (2.00, 4.80) |
| Daily sleeping time [median (IQR), hour] | 7.00 (7.00, 8.00) |
| Daily cigarette smoking [n (%)] |  |
| Non-smoking | 180 (87.38) |
| ~10 | 20 (9.71) |
| > 10 | 6 (2.91) |
| Family member daily cigarette smoking [n (%)] |  |
| Non-smoking | 156 (75.73) |
| ~10 | 39 (18.93) |
| > 10 | 11 (5.34) |
| Alcohol drinking (yes/no) | 58/148 |
| Window opening frequency (occasionally/often) | 29/177 |
| Distance between residence and road [n (%), m] |  |
| ≤ 100 | 104 (50.49) |
| > 100 | 102 (49.51) |
| Night shift frequency [n (%)] |  |
| Occasionally or none | 65 (31.55) |
| 1 week-1month per 1time | 70 (33.98) |
| At least twice a week | 71 (34.47) |
| Educational level [n (%)] |  |
| College | 48 (23.30) |
| Bachelor | 133 (64.56) |
| Master/ doctor | 25 (12.14) |
| Monthly household income [n (%), yuan] |  |
| < 10000 | 101 (49.03) |
| 10000~15000 | 62 (30.10) |
| > 15000 | 43 (20.87) |
| AST [median (IQR), U/L] | 21.00 (18.00, 25.00) |
| ALT [median (IQR), U/L] | 14.00 (10.00, 22.00) |
| Total protein [mean ± SD, g/L] | 79.50 ± 4.54 |
| Albumin [mean ± SD, g/L] | 48.48 ± 2.55 |
| Total cholesterol (mean ± SD, mmol/L) | 4.68 ± 0.84 |
| Triglycerides [median (IQR), mmol/L] | 1.32 (0.91, 2.14) |
| HDL-C (mean ± SD, mmol/L) | 1.24 ± 0.30 |
| LDL-C (mean ± SD, mmol/L) | 2.50 ± 0.64 |
| Uric Acid [median (IQR), umol/L] | 313.00 (263.75, 391.50) |
| Urea (mean ± SD, mmol/L) | 5.29 ± 1.18 |
| Creatinine [median (IQR), umol/L] | 59.00 (51.75, 75.00) |
| CVAI [median (IQR)] | 40.26 (18.40, 88.30) |

ALT, alanine amino transferase; AST, aspartate amino transferase; BMI, body mass index; CVAI, Chinese visceral adiposity index; HDL-C, high-density lipoprotein cholesterol; IQR, interquartile range; LDL-C, low-density lipoprotein cholesterol; SD, standard deviation.

**Table S2 Model summary of multiple correspondence analysis for** **gender, CVAI, and plasma NAb titers**

| Dimension | Cronbach’s Alpha | Variance Accounted for | | |
| --- | --- | --- | --- | --- |
| Total (Eigenvalue) | Inertia | % of Variance |
| 1 | 0.634 | 1.732 | 0.577 | 57.717 |
| 2 | 0.019 | 1.013 | 0.338 | 33.754 |
| Total | / | 2.744 | 0.915 | / |
| Mean | 0.407* | 1.372 | 0.457 | 45.735 |

*Mean Cronbach’s Alpha is based on the mean Eigenvalue

CVAI, Chinese visceral adiposity index; NAb, Neutralizing antibody
